# Supplementary material
Source: HighWire-hosted journal article supplement (https://bmjopen.bmj.com/content/11/6/e043987)
Supplement: inline-supplementary-material-1 [file inline-supplementary-material-1.pdf]

**Supplementary Table 1.** Sample Description of the Study Population

| <b>Background Variables</b>  | <i>N</i> | %    | <b>Background Variables</b>                                        | <i>N</i> | %    |
|------------------------------|----------|------|--------------------------------------------------------------------|----------|------|
| <b>Age</b>                   |          |      | <b>Knowledge of Adverse Health Impact of Smokeless Tobacco Use</b> |          |      |
| 15-18                        | 4641     | 10.5 | No                                                                 | 1051     | 1.4  |
| 19-23                        | 7161     | 13.8 | Partial                                                            | 14459    | 20.5 |
| 24-30                        | 13867    | 18.2 | Full                                                               | 58527    | 78.1 |
| 31-40                        | 18839    | 21.0 | <b>Caste</b>                                                       |          |      |
| 41-50                        | 13245    | 15.3 | Others                                                             | 21734    | 26.8 |
| 51-60                        | 8531     | 10.8 | SCs                                                                | 12854    | 19.1 |
| 60+                          | 7753     | 10.4 | STs                                                                | 12128    | 8.9  |
| <b>Sex</b>                   |          |      | OBCs                                                               | 27321    | 45.3 |
| Female                       | 40265    | 48.9 | <b>Religion</b>                                                    |          |      |
| Male                         | 33772    | 51.1 | Hindu                                                              | 54015    | 80.3 |
| <b>Marital Status</b>        |          |      | Muslim                                                             | 8785     | 14.2 |
| Married                      | 56984    | 70.1 | Christian                                                          | 7111     | 2.3  |
| Unmarried                    | 11951    | 23.0 | others                                                             | 4126     | 3.1  |
| Widowed/Separated/Divorced   | 5102     | 6.9  | <b>Wealth Quintile</b>                                             |          |      |
| <b>Education</b>             |          |      | Poorest                                                            | 15547    | 23.4 |
| No formal Education          | 18473    | 26.4 | Poorer                                                             | 18685    | 26.3 |
| <Primary completed           | 7510     | 9.2  | Middle                                                             | 11278    | 16.8 |
| Primary completed            | 8858     | 11.3 | Richer                                                             | 14814    | 19.6 |
| <Secondary completed         | 12109    | 16.9 | Richest                                                            | 13713    | 13.8 |
| Secondary completed          | 10331    | 14.1 | <b>Place of Residence</b>                                          |          |      |
| Higher Secondary completed   | 7959     | 11.2 | Urban                                                              | 26488    | 34.5 |
| College/University completed | 6096     | 7.8  | Rural                                                              | 47549    | 65.5 |
| Post-graduate completed      | 2642     | 3.1  | <b>Region</b>                                                      |          |      |
| <b>Occupation</b>            |          |      | North                                                              | 17128    | 8.7  |
| Student                      | 6134     | 11.9 | Central                                                            | 11518    | 29.1 |
| Government Employee          | 3355     | 2.7  | East                                                               | 9834     | 21.7 |
| Non-government Employee      | 6259     | 8.3  | Northeast                                                          | 13574    | 3.7  |
| Daily Wage/Casual Labourer   | 13749    | 21.2 | West                                                               | 7901     | 15.0 |
| Self-employed                | 13955    | 19.4 | South                                                              | 14082    | 21.8 |
| Homemaker                    | 25833    | 30.1 |                                                                    |          |      |
| Retired                      | 1679     | 2.1  |                                                                    |          |      |
| Unemployed able to work      | 1572     | 1.9  |                                                                    |          |      |
| Unemployed unable to work    | 1471     | 2.3  |                                                                    |          |      |
| Don't know or refused        | 30       | 0.0  |                                                                    |          |      |

All *N* are unweighted

**Supplementary Table 2.** Prevalence (in %) of Areca Nut Use in Different Forms across States & Union Territories of India, GATS 2016-17

| States/UTs        | <i>Pan Masala without Tobacco</i> | <i>Pan Masala with Tobacco</i> | <i>Betel Quid without Tobacco</i> | <i>Betel Quid with Tobacco</i> | <i>Gutka, Areca Nut-Tobacco Lime Mixture, or Mawa</i> | <i>Areca Nut of Any Type</i> |
|-------------------|-----------------------------------|--------------------------------|-----------------------------------|--------------------------------|-------------------------------------------------------|------------------------------|
| <b>North</b>      |                                   |                                |                                   |                                |                                                       |                              |
| Jammu & Kashmir   | 0.2                               | 0.2                            | 0.3                               | 0.8                            | 0.4                                                   | 0.2                          |
| Himachal Pradesh  | 0.7                               | 0.1                            | 0.4                               | 0.0                            | 0.5                                                   | 0.6                          |
| Punjab            | 0.5                               | 0.2                            | 0.3                               | 0.4                            | 2.3                                                   | 0.4                          |
| Chandigarh        | 0.5                               | 0.4                            | 0.6                               | 0.9                            | 1.0                                                   | 1.2                          |
| Uttarakhand       | 3.1                               | 3.1                            | 8.6                               | 2.7                            | 2.2                                                   | 10.8                         |
| Haryana           | 1.3                               | 0.4                            | 0.5                               | 1.1                            | 2.5                                                   | 1.4                          |
| Delhi             | 4.9                               | 1.3                            | 8.3                               | 2.6                            | 3.0                                                   | 7.6                          |
| <b>Central</b>    |                                   |                                |                                   |                                |                                                       |                              |
| Rajasthan         | 3.5                               | 4.6                            | 1.4                               | 4.0                            | 9.0                                                   | 6.1                          |
| Uttar Pradesh     | 7.0                               | 7.2                            | 12.8                              | 10.2                           | 11.5                                                  | 7.6                          |
| Chhattisgarh      | 6.1                               | 1.8                            | 2.1                               | 2.0                            | 7.8                                                   | 3.4                          |
| Madhya Pradesh    | 3.8                               | 4.4                            | 2.4                               | 4.1                            | 13.7                                                  | 6.7                          |
| <b>East</b>       |                                   |                                |                                   |                                |                                                       |                              |
| West Bengal       | 4.8                               | 2.2                            | 5.7                               | 6.4                            | 2.9                                                   | 11.6                         |
| Jharkhand         | 7.4                               | 1.1                            | 1.2                               | 4.9                            | 8.3                                                   | 2.0                          |
| Odisha            | 11.1                              | 8.6                            | 4.9                               | 8.6                            | 9.4                                                   | 5.5                          |
| Bihar             | 5.2                               | 1.4                            | 1.5                               | 3.4                            | 3.7                                                   | 2.3                          |
| <b>North-East</b> |                                   |                                |                                   |                                |                                                       |                              |
| Sikkim            | 4.7                               | 0.5                            | 5.4                               | 2.6                            | 1.2                                                   | 7.0                          |
| Arunachal Pradesh | 11.5                              | 4.7                            | 13.6                              | 14.9                           | 18.9                                                  | 5.1                          |
| Nagaland          | 8.7                               | 21.1                           | 8.8                               | 17.5                           | 9.4                                                   | 2.2                          |
| Manipur           | 7.9                               | 4.2                            | 23.1                              | 38.6                           | 2.7                                                   | 1.1                          |
| Mizoram           | 4.0                               | 0.8                            | 55.1                              | 4.3                            | 4.0                                                   | 5.9                          |
| Tripura           | 6.4                               | 10.4                           | 8.3                               | 39.5                           | 2.5                                                   | 22.6                         |
| Meghalaya         | 10.7                              | 2.5                            | 64.9                              | 12.0                           | 2.4                                                   | 3.8                          |
| Assam             | 10.9                              | 2.9                            | 46.6                              | 19.0                           | 8.2                                                   | 11.9                         |
| <b>West</b>       |                                   |                                |                                   |                                |                                                       |                              |
| Gujarat           | 3.5                               | 1.4                            | 4.9                               | 1.1                            | 12.8                                                  | 4.7                          |
| Maharashtra       | 6.6                               | 1.7                            | 6.7                               | 3.7                            | 8.6                                                   | 17.0                         |
| Goa               | 7.2                               | 1.3                            | 9.6                               | 2.7                            | 2.6                                                   | 11.0                         |
| <b>South</b>      |                                   |                                |                                   |                                |                                                       |                              |
| Andhra Pradesh    | 0.3                               | 0.2                            | 4.9                               | 2.4                            | 1.9                                                   | 5.6                          |
| Telangana         | 2.9                               | 1.1                            | 3.1                               | 3.9                            | 2.9                                                   | 8.0                          |
| Karnataka         | 4.7                               | 0.7                            | 27.8                              | 9.4                            | 5.9                                                   | 8.3                          |

---

|              |            |            |            |            |            |            |
|--------------|------------|------------|------------|------------|------------|------------|
| Kerala       | 1.2        | 0.4        | 2.1        | 4.4        | 0.7        | 0.9        |
| Tamil Nadu   | 0.2        | 0.1        | 18.6       | 6.0        | 0.7        | 19.1       |
| Puducherry   | 0.8        | 0.1        | 7.7        | 3.4        | 0.7        | 15.1       |
| <b>India</b> | <b>4.8</b> | <b>2.8</b> | <b>8.7</b> | <b>5.8</b> | <b>6.8</b> | <b>8.0</b> |

---

**Supplementary Table 3.** Prevalence (in %) of Areca Nut Use in Different Forms by Urban and Rural area Across States & Union Territories of India, GATS 2016-17

| States/UTs        | Urban                              |                                 |          |          | Rural                              |                                 |          |          |
|-------------------|------------------------------------|---------------------------------|----------|----------|------------------------------------|---------------------------------|----------|----------|
|                   | Areca nut use only without tobacco | Areca nut use only with tobacco | Dual use | Any form | Areca nut use only without tobacco | Areca nut use only with tobacco | Dual use | Any form |
| <b>North</b>      |                                    |                                 |          |          |                                    |                                 |          |          |
| Jammu & Kashmir   | 1.2                                | 0.7                             | 0.0      | 1.8      | 0.1                                | 0.9                             | 0.0      | 1.1      |
| Himachal Pradesh  | 3.3                                | 1.6                             | 0.0      | 4.9      | 1.0                                | 0.2                             | 0.0      | 1.2      |
| Punjab            | 1.3                                | 3.7                             | 0.3      | 5.3      | 0.8                                | 0.8                             | 0.1      | 1.7      |
| Chandigarh        | 1.7                                | 1.6                             | 0.1      | 3.5      | 1.9                                | 0.0                             | 0.0      | 1.9      |
| Uttarakhand       | 19.8                               | 4.2                             | 1.4      | 25.4     | 16.3                               | 3.6                             | 1.2      | 21.0     |
| Haryana           | 3.0                                | 4.7                             | 0.4      | 8.2      | 2.3                                | 0.8                             | 0.1      | 3.3      |
| Delhi             | 15.9                               | 2.0                             | 1.0      | 18.9     | 3.4                                | 2.1                             | 0.0      | 5.5      |
| <b>Central</b>    |                                    |                                 |          |          |                                    |                                 |          |          |
| Rajasthan         | 9.1                                | 8.8                             | 1.2      | 19.0     | 7.0                                | 5.6                             | 1.4      | 14.0     |
| Uttar Pradesh     | 26.0                               | 9.2                             | 3.2      | 38.4     | 15.7                               | 13.5                            | 3.5      | 32.7     |
| Chhattisgarh      | 10.6                               | 12.4                            | 1.5      | 24.5     | 7.6                                | 5.6                             | 1.0      | 14.2     |
| Madhya Pradesh    | 11.9                               | 12.3                            | 2.7      | 26.9     | 7.1                                | 13.9                            | 1.8      | 22.9     |
| <b>East</b>       |                                    |                                 |          |          |                                    |                                 |          |          |
| West Bengal       | 8.2                                | 2.4                             | 2.8      | 13.4     | 16.3                               | 5.1                             | 4.3      | 25.7     |
| Jharkhand         | 7.8                                | 7.7                             | 0.8      | 16.3     | 8.4                                | 8.4                             | 1.2      | 18.0     |
| Odisha            | 13.5                               | 13.3                            | 1.6      | 28.4     | 10.8                               | 11.1                            | 5.5      | 27.4     |
| Bihar             | 4.3                                | 5.7                             | 0.4      | 10.4     | 7.4                                | 4.9                             | 0.5      | 12.8     |
| <b>North-East</b> |                                    |                                 |          |          |                                    |                                 |          |          |
| Sikkim            | 13.3                               | 1.3                             | 0.3      | 15.0     | 10.7                               | 1.6                             | 0.9      | 13.2     |
| Arunachal Pradesh | 18.1                               | 13.3                            | 4.4      | 35.8     | 17.1                               | 20.3                            | 3.4      | 40.9     |
| Nagaland          | 10.6                               | 15.2                            | 7.0      | 32.7     | 9.2                                | 15.1                            | 5.2      | 29.4     |
| Manipur           | 27.0                               | 18.7                            | 4.2      | 49.9     | 21.7                               | 22.4                            | 7.1      | 51.2     |
| Mizoram           | 51.5                               | 0.3                             | 6.0      | 57.8     | 54.7                               | 1.3                             | 2.3      | 58.4     |
| Tripura           | 12.5                               | 19.9                            | 10.4     | 42.8     | 15.0                               | 15.8                            | 15.6     | 46.5     |
| Meghalaya         | 52.6                               | 1.9                             | 4.4      | 58.9     | 66.3                               | 1.5                             | 6.4      | 74.2     |
| Assam             | 37.5                               | 11.1                            | 8.5      | 57.1     | 47.2                               | 11.5                            | 11.0     | 69.7     |
| <b>West</b>       |                                    |                                 |          |          |                                    |                                 |          |          |
| Gujarat           | 10.4                               | 10.0                            | 1.3      | 21.7     | 6.5                                | 12.0                            | 1.0      | 19.5     |
| Maharashtra       | 22.0                               | 7.6                             | 3.2      | 32.8     | 17.5                               | 6.3                             | 2.6      | 26.4     |
| Goa               | 16.2                               | 1.3                             | 0.6      | 18.1     | 19.3                               | 1.3                             | 2.2      | 22.7     |
| <b>South</b>      |                                    |                                 |          |          |                                    |                                 |          |          |
| Andhra Pradesh    | 8.3                                | 0.8                             | 0.6      | 9.8      | 5.9                                | 1.5                             | 1.4      | 8.9      |
| Telangana         | 10.7                               | 2.8                             | 2.5      | 16.0     | 7.3                                | 2.8                             | 1.6      | 11.8     |
| Karnataka         | 26.6                               | 6.3                             | 2.9      | 35.8     | 30.3                               | 8.7                             | 5.3      | 44.2     |
| Kerala            | 2.4                                | 1.8                             | 0.5      | 4.7      | 3.7                                | 3.5                             | 0.4      | 7.6      |
| Tamil Nadu        | 26.1                               | 1.1                             | 0.6      | 27.7     | 24.9                               | 6.6                             | 1.7      | 33.2     |
| Puducherry        | 13.5                               | 0.8                             | 0.7      | 15.0     | 27.3                               | 4.5                             | 3.2      | 34.9     |

---

|              |             |            |            |             |             |            |            |             |
|--------------|-------------|------------|------------|-------------|-------------|------------|------------|-------------|
| <b>India</b> | <b>15.7</b> | <b>6.1</b> | <b>2.0</b> | <b>23.8</b> | <b>13.5</b> | <b>7.9</b> | <b>2.7</b> | <b>24.1</b> |
|--------------|-------------|------------|------------|-------------|-------------|------------|------------|-------------|

---

**Supplementary Table 4.** Prevalence (in %) of Areca Nut Use in Different Forms by sex Across States & Union Territories of India, GATS 2016-17

| States/UTs        | Female                             |                                 |            |             | Male                               |                                 |            |             |
|-------------------|------------------------------------|---------------------------------|------------|-------------|------------------------------------|---------------------------------|------------|-------------|
|                   | Areca nut use only without tobacco | Areca nut use only with tobacco | Dual use   | Any form    | Areca nut use only without tobacco | Areca nut use only with tobacco | Dual use   | Any form    |
| <b>North</b>      |                                    |                                 |            |             |                                    |                                 |            |             |
| Jammu & Kashmir   | 0.3                                | 0.2                             | 0.1        | 0.6         | 0.6                                | 1.5                             | 0.0        | 2.1         |
| Himachal Pradesh  | 0.1                                | 0.0                             | 0.0        | 0.1         | 2.3                                | 0.6                             | 0.1        | 3.0         |
| Punjab            | 1.1                                | 0.1                             | 0.1        | 1.2         | 0.9                                | 3.7                             | 0.2        | 4.8         |
| Chandigarh        | 2.0                                | 0.4                             | 0.0        | 2.4         | 1.6                                | 2.6                             | 0.1        | 4.3         |
| Uttarakhand       | 16.3                               | 1.1                             | 0.0        | 17.4        | 18.7                               | 6.4                             | 2.5        | 27.6        |
| Haryana           | 2.3                                | 0.6                             | 0.1        | 3.0         | 2.9                                | 3.9                             | 0.4        | 7.2         |
| Delhi             | 11.9                               | 1.0                             | 0.3        | 13.2        | 18.9                               | 2.8                             | 1.6        | 23.3        |
| <b>Central</b>    |                                    |                                 |            |             |                                    |                                 |            |             |
| Rajasthan         | 4.9                                | 2.4                             | 0.1        | 7.4         | 10.1                               | 10.4                            | 2.5        | 23.0        |
| Uttar Pradesh     | 14.3                               | 4.8                             | 1.5        | 20.6        | 21.9                               | 19.5                            | 5.3        | 46.7        |
| Chhattisgarh      | 4.2                                | 1.8                             | 0.2        | 6.2         | 12.5                               | 13.1                            | 2.1        | 27.7        |
| Madhya Pradesh    | 4.9                                | 5.5                             | 1.7        | 12.1        | 12.0                               | 20.9                            | 2.5        | 35.3        |
| <b>East</b>       |                                    |                                 |            |             |                                    |                                 |            |             |
| West Bengal       | 13.9                               | 3.5                             | 5.8        | 23.2        | 13.0                               | 4.7                             | 1.8        | 19.4        |
| Jharkhand         | 9.0                                | 0.6                             | 0.5        | 10.1        | 7.6                                | 15.5                            | 1.6        | 24.7        |
| Odisha            | 9.1                                | 4.7                             | 5.9        | 19.6        | 13.5                               | 18.4                            | 3.7        | 35.6        |
| Bihar             | 2.6                                | 0.4                             | 0.1        | 3.2         | 11.0                               | 9.3                             | 0.9        | 21.1        |
| <b>North-East</b> |                                    |                                 |            |             |                                    |                                 |            |             |
| Sikkim            | 13.1                               | 0.5                             | 0.5        | 14.1        | 10.1                               | 2.5                             | 0.9        | 13.5        |
| Arunachal Pradesh | 27.6                               | 10.2                            | 4.8        | 42.6        | 7.8                                | 26.3                            | 2.6        | 36.8        |
| Nagaland          | 8.5                                | 17.3                            | 5.1        | 30.9        | 10.7                               | 13.1                            | 6.4        | 30.2        |
| Manipur           | 22.3                               | 27.4                            | 4.8        | 54.5        | 25.0                               | 14.7                            | 7.3        | 46.9        |
| Mizoram           | 47.4                               | 1.4                             | 6.7        | 55.5        | 58.4                               | 0.2                             | 2.1        | 60.6        |
| Tripura           | 19.4                               | 21.7                            | 20.6       | 61.6        | 9.4                                | 12.6                            | 7.7        | 29.7        |
| Meghalaya         | 60.3                               | 1.7                             | 10.4       | 72.4        | 66.2                               | 1.4                             | 1.5        | 69.1        |
| Assam             | 45.6                               | 13.3                            | 11.1       | 69.9        | 45.6                               | 9.7                             | 10.1       | 65.4        |
| <b>West</b>       |                                    |                                 |            |             |                                    |                                 |            |             |
| Gujarat           | 5.4                                | 3.9                             | 0.9        | 10.2        | 11.0                               | 17.7                            | 1.4        | 30.1        |
| Maharashtra       | 23.3                               | 2.4                             | 3.0        | 28.6        | 16.2                               | 11.2                            | 2.8        | 30.2        |
| Goa               | 20.9                               | 0.4                             | 1.4        | 22.6        | 13.8                               | 2.1                             | 0.9        | 16.8        |
| <b>South</b>      |                                    |                                 |            |             |                                    |                                 |            |             |
| Andhra Pradesh    | 10.0                               | 1.8                             | 2.2        | 14.0        | 3.4                                | 0.8                             | 0.1        | 4.3         |
| Telangana         | 5.8                                | 3.1                             | 2.8        | 11.6        | 11.7                               | 2.6                             | 1.2        | 15.5        |
| Karnataka         | 38.9                               | 2.4                             | 4.8        | 46.2        | 18.7                               | 12.8                            | 3.7        | 35.3        |
| Kerala            | 1.8                                | 2.4                             | 0.6        | 4.8         | 4.4                                | 2.9                             | 0.3        | 7.6         |
| Tamil Nadu        | 20.8                               | 4.5                             | 1.3        | 26.5        | 30.4                               | 3.0                             | 1.1        | 34.4        |
| Puducherry        | 14.1                               | 2.3                             | 2.3        | 18.7        | 21.5                               | 1.5                             | 0.5        | 23.4        |
| <b>India</b>      | <b>13.2</b>                        | <b>3.4</b>                      | <b>2.3</b> | <b>18.9</b> | <b>15.2</b>                        | <b>11.0</b>                     | <b>2.6</b> | <b>28.8</b> |
